# Supplementary material for: Stability Curve Prediction of Homologous Proteins Using Temperature-Dependent Statistical Potentials
Source: PubMed Central journal article supplement (PMC4102405; doi:10.1371/journal.pcbi.1003689), 2014-07-17
Supplement: pcbi.1003689.s001.pdf [file pcbi.1003689.s001.pdf]

**Table S 1:** List of 45 proteins with known melting temperature analyzed in this study.

| <b>Protein</b><br>PDB code | $T_m^{\text{exp}}$<br>(°C) | pH   | Protein Name          | Res.<br>(Å) | Host Organism                      | $T_{\text{env}}$<br>(°C) | N   | Reference                                 |
|----------------------------|----------------------------|------|-----------------------|-------------|------------------------------------|--------------------------|-----|-------------------------------------------|
| 1aqh                       | 43.7                       | 7.2  | $\alpha$ -amylase     | 2.00        | <i>Alteromonas haloplanctis</i>    | 26.0                     | 448 | J Biol Chem 276, 25791 (2001)             |
| 1ppi                       | 65.6                       | 7.2  | $\alpha$ -amylase     | 2.20        | <i>Sus Scrofa</i>                  | 39.0                     | 496 | J Biol Chem 276, 25791 (2001)             |
| 1jae                       | 65.9                       | 7.2  | $\alpha$ -amylase     | 1.65        | <i>Tenebrio Molitor</i>            | 28.0                     | 470 | J Biol Chem 276, 25791 (2001)             |
| 1smd                       | 70.3                       | 7.2  | $\alpha$ -amylase     | 1.60        | <i>Homo Sapiens</i>                | 37.0                     | 495 | J Biol Chem 276, 25791 (2001)             |
| 1am7                       | 52.3                       | 7.0  | Lysozyme              | 2.30        | <i>Bacteriophage Lambda</i>        | 37.0                     | 150 | FEBS Lett 460, 442 (1999)                 |
| 2lzm                       | 64.8                       | 6.5  | Lysozyme              | 1.70        | <i>Escherichia Coli</i>            | 37.0                     | 164 | Nature 334,406 (1988), PNAS 85,401 (1988) |
| 1lz1                       | 64.9                       | 2.7  | Lysozyme              | 1.50        | <i>Homo Sapiens</i>                | 37.0                     | 130 | J Mol Biol 254, 62 (1995)                 |
| 4lyz                       | 74.8                       | 7.0  | Lysozyme              | 2.00        | <i>Gallus Gallus</i>               | 41.0                     | 129 | Proteins 40, 49 (2000)                    |
| 2fal                       | 52.0                       | 7.0  | Myoglobin             | 1.80        | <i>Aplysia Limacina</i>            | 17.0                     | 146 | J Mol Biol 297, 1231 (2000)               |
| 1ymb                       | 78.3                       | 7.0  | Myoglobin             | 1.90        | <i>Equus Caballus</i>              | 38.0                     | 153 | Biochemistry 4, 5075 (2001)               |
| 1bvc                       | 82.2                       | 9.6  | Myoglobin             | 1.50        | <i>Physeter Catodon</i>            | 35.0                     | 153 | Protein Sci 2, 1099 (1993)                |
| 1bc                        | 41.6                       | 7.50 | $\beta$ -lactamase    | 2.20        | <i>Staphylococcus Aureus</i>       | 34.0                     | 257 | Biochemistry 33, 116 (1994)               |
| 1ke4                       | 54.6                       | 6.80 | $\beta$ -lactamase    | 1.72        | <i>Escherichia Coli</i>            | 37.0                     | 357 | Protein Sci 8, 1816 (1999)                |
| 4blm                       | 66.0                       | 7.00 | $\beta$ -lactamase    | 2.00        | <i>Bacillus Licheniformis</i>      | 43.0                     | 256 | Biochemistry 29, 5797 (1990)              |
| 1bmc                       | 51.0                       | 7.00 | $\beta$ -lactamase    | 2.50        | <i>Bacillus Cereus</i>             | 30.0                     | 213 | Biochemistry 61, 6603 (1992)              |
| 1hml                       | 39.5                       | 7.00 | $\alpha$ -lactalbumin | 1.70        | <i>Homo Sapiens</i>                | 37.0                     | 123 | Biochemistry 28, 8568 (1989)              |
| 1hfz                       | 56.2                       | 7.40 | $\alpha$ -lactalbumin | 2.30        | <i>Bos Taurus</i>                  | 38.0                     | 123 | Protein Eng 12, 581 (1999)                |
| 1hmk                       | 70.8                       | 7.50 | $\alpha$ -lactalbumin | 2.00        | <i>Capra Hircus</i>                | 39.0                     | 121 | Proteins 60, 118 (2005)                   |
| 2vh7                       | 53.8                       | 5.50 | Acylphosphatase       | 1.45        | <i>Homo Sapiens</i>                | 37.0                     | 99  | Proteins 62, 64 (2006)                    |
| 2bjd                       | 100.8                      | 5.50 | Acylphosphatase       | 1.27        | <i>Sulfolobus Solfataricus</i>     | 80.0                     | 90  | Proteins 62, 64 (2006)                    |
| 1v3z                       | 111.5                      | 7.40 | Acylphosphatase       | 1.72        | <i>Pyrococcus Horikoshii</i>       | 98.0                     | 91  | Biochemistry 38, 33 (2005)                |
| 1p3j                       | 47.6                       | 7.40 | Adenylate kinase      | 1.90        | <i>Bacillus Subtilis</i>           | 37.0                     | 212 | J Bio Chem 279, 28202 (2004)              |
| 3fb4                       | 47.6                       | 7.40 | Adenylate kinase      | 2.00        | <i>Jeotgalibacillus Marinus</i>    | 18.0                     | 216 | J Bio Chem 279, 28202 (2004)              |
| 1s3g                       | 43.4                       | 7.40 | Adenylate kinase      | 2.25        | <i>Bacillus Globisporus</i>        | 15.0                     | 217 | J Bio Chem 279, 28202 (2004)              |
| 1aky                       | 47.7                       | 7.50 | Adenylate kinase      | 1.96        | <i>Saccharomyces Cerevisiae</i>    | 28.0                     | 218 | Eur J Biochem 231, 405 (1995)             |
| 1ank                       | 51.8                       | 7.20 | Adenylate kinase      | 2.00        | <i>Escherichia Coli</i>            | 37.0                     | 214 | J Biol Chem 266, 23654 (1991)             |
| 1zip                       | 74.8                       | 7.20 | Adenylate kinase      | 1.85        | <i>Bacillus Stearothermophilus</i> | 51.0                     | 217 | Biochemistry 31, 3038 (1992)              |
| 1oa3                       | 49.2                       | 8.00 | Cell 12A              | 1.70        | <i>Hypocrea Schweinitzii</i>       | 40.0                     | 217 | Protein Sci 12, 848 (2003)                |
| 1h8v                       | 54.5                       | 8.00 | Cell 12A              | 1.90        | <i>Trichoderma Reesei</i>          | 35.0                     | 217 | Protein Sci 12, 2782 (2003)               |
| 1oa4                       | 66.8                       | 8.00 | Cell 12A              | 1.50        | <i>Streptomyces sp. 11ag8</i>      | 30.0                     | 222 | Protein Sci 12, 848 (2003)                |

|      |       |      |                    |      |                                   |      |     |                                                           |
|------|-------|------|--------------------|------|-----------------------------------|------|-----|-----------------------------------------------------------|
| 1olr | 68.7  | 8.00 | Cell 12A           | 1.20 | <i>Humicola Grisea</i>            | 50.0 | 223 | Protein Sci 12, 2872 (2003)                               |
| 1cec | 70.4  | 7.20 | Cell 12A           | 2.15 | <i>Clostridium Thermocellum</i>   | 60.0 | 331 | Biophys Chem 132, 229 (2002)                              |
| 1csp | 53.8  | 7.00 | Cold Shock Protein | 2.50 | <i>Bacillus Subtilis</i>          | 37.0 | 67  | J Mol Bio 347, 1063 (2005)                                |
| 1mjc | 57.0  | 7.00 | Cold Shock Protein | 2.00 | <i>Escherichia Coli</i>           | 37.0 | 69  | Protein Sci 9, 387 (2000), Protein Sci 10, 2028 (2001)    |
| 1c9o | 76.9  | 7.00 | Cold Shock Protein | 1.17 | <i>Bacillus Caldolyticus</i>      | 70.0 | 66  | Nat Struct Biol 7, 380 (2000), J Mol Biol 319, 541 (2002) |
| 1bu7 | 47.0  | 7.40 | Cytochrome p450    | 1.65 | <i>Bacillus Megaterium</i>        | 30.0 | 455 | J Biol Chem 278, 608 (2003)                               |
| 1oxa | 55.1  | 7.40 | Cytochrome p450    | 2.10 | <i>Saccaropolyspora Erythraea</i> | 31.0 | 403 | J Biol Chem 278, 608 (2003)                               |
| 1akd | 56.0  | 7.40 | Cytochrome p450    | 1.80 | <i>Pseudomonas putida</i>         | 30.0 | 405 | J Biol Chem 278, 608 (2003)                               |
| 1n97 | 88.5  | 7.40 | Cytochrome p450    | 1.80 | <i>Thermus thermophilus</i>       | 68.0 | 385 | J Biol Chem 278, 608 (2003)                               |
| 1f4t | 91.0  | 7.40 | Cytochrome p450    | 1.93 | <i>Solfolobus Solfataricus</i>    | 78.0 | 367 | J Biol Chem 278, 608 (2003)                               |
| 1rgg | 49.3  | 7.00 | Ribonuclease       | 1.40 | <i>Streptomyces aureofaciens</i>  | 28.0 | 96  | Biochemistry 37, 16192 (1998), Protein Sci 8, 1843 (1999) |
| 9rnt | 50.9  | 7.00 | Ribonuclease       | 1.50 | <i>Aspergillus Oryzae</i>         | 49.0 | 104 | J Mol Biol 279, 31790 (2003), J Mol Biol 354, 967 (2005)  |
| 1rmh | 53.2  | 5.50 | Ribonuclease       | 2.00 | <i>Escherichia Coli</i>           | 37.0 | 155 | Eur J Biochem 220, 663 (1994)                             |
| 1rbn | 63.6  | 7.10 | Ribonuclease       | 2.10 | <i>Bos Taurus</i>                 | 38.0 | 123 | Biochemistry 45, 10795 (2009)                             |
| 2ehg | 102.0 | 7.00 | Ribonuclease       | 1.60 | <i>Sulfolobus tokodaii</i>        | 80.0 | 149 | PLoS ONE 6, e16226 (2011)                                 |
