# Supplementary material for: Stability Curve Prediction of Homologous Proteins Using Temperature-Dependent Statistical Potentials
Source: PubMed Central journal article supplement (PMC4102405; doi:10.1371/journal.pcbi.1003689), 2014-07-17
Supplement: pcbi.1003689.s002.pdf [file pcbi.1003689.s002.pdf]

| <b>Protein</b> | $T_m^{\text{exp}}$ | $T_m^{\text{pre}}$ | $\Delta C_p^{\text{exp}}$ | $\Delta C_p^{\text{pre}}$ | $\Delta G_{25}^{\text{exp}}$ | $\Delta G_{25}^{\text{pre}}$ |
|----------------|--------------------|--------------------|---------------------------|---------------------------|------------------------------|------------------------------|
| PDB code       | (°C)               | (°C)               | (kcal/(mol °C))           | (kcal/(mol °C))           | kcal/mol                     | kcal/mol                     |
| 1aqh           | 43.7               | 50.3               | 8.5                       | 13.0                      | 9.1                          | 12.8                         |
| 1ppi           | 65.6               | 51.2               | -                         | 13.1                      | -                            | 16.9                         |
| 1jae           | 65.9               | 70.5               | -                         | 10.5                      | -                            | 18.0                         |
| 1smd           | 70.3               | 70.2               | -                         | 10.6                      | -                            | 18.3                         |
| 1am7           | 52.3               | 54.4               | -                         | 2.6                       | -                            | 5.8                          |
| 2lzm           | 64.8               | 83.0               | 2.0                       | 1.5                       | 10.3                         | 5.5                          |
| 1lz1           | 64.9               | 64.8               | -                         | 1.7                       | -                            | 5.1                          |
| 4lyz           | 74.8               | 56.0               | 1.6                       | 3.4                       | 7.2                          | 7.2                          |
| 2fal           | 52.0               | 56.0               | -                         | 2.5                       | -                            | 4.2                          |
| 1ymb           | 78.3               | 86.8               | -                         | 1.4                       | -                            | 3.7                          |
| 1bvc           | 82.2               | 75.2               | 2.8                       | 1.7                       | 15.4                         | 5.1                          |
| 1blc           | 41.6               | 54.7               | -                         | 2.6                       | -                            | 9.3                          |
| 1ke4           | 54.6               | 51.0               | -                         | 2.5                       | -                            | 8.4                          |
| 4blm           | 66.0               | 62.8               | 3.8                       | 2.6                       | 7.1                          | 11.2                         |
| 1bmc           | 51.0               | 40.0               | -                         | 2.8                       | -                            | 5.2                          |
| 1hml           | 39.5               | 53.4               | 1.1                       | 1.9                       | -                            | 5.3                          |
| 1hfz           | 56.2               | 60.8               | 1.4                       | 0.8                       | 4.1                          | 2.8                          |
| 1hmk           | 70.8               | 52.3               | -                         | 0.7                       | -                            | 2.7                          |
| 2vh7           | 53.8               | 71.4               | 1.5                       | 1.2                       | 4.2                          | 4.6                          |
| 2bjd           | 100.8              | 81.9               | 1.1                       | 2.0                       | 12.0                         | 9.5                          |
| 1v3z           | 111.5              | 112.9              | -                         | 1.4                       | -                            | 9.6                          |
| 1p3j           | 47.6               | 63.3               | -                         | 1.9                       | -                            | 10.1                         |
| 3fb4           | 47.6               | 49.2               | -                         | 1.8                       | -                            | 7.9                          |
| 1s3g           | 43.4               | 43.6               | -                         | 1.9                       | -                            | 6.3                          |
| 1aky           | 47.7               | 42.0               | 2.0                       | 1.8                       | 4.1                          | 5.9                          |
| 1ank           | 51.8               | 38.0               | -                         | 1.5                       | -                            | 4.8                          |
| 1zip           | 74.8               | 74.7               | -                         | 1.6                       | -                            | 14.2                         |
| 1oa3           | 49.2               | 48.1               | -                         | 2.5                       | -                            | 6.5                          |
| 1h8v           | 54.5               | 50.3               | -                         | 2.9                       | -                            | 8.1                          |
| 1oa4           | 66.8               | 66.7               | -                         | 3.9                       | -                            | 10.7                         |
| 1olr           | 68.7               | 59.8               | -                         | 2.9                       | -                            | 7.6                          |
| 1cec           | 70.4               | 71.4               | -                         | 3.0                       | -                            | 10.3                         |
| 1csp           | 53.8               | 56.3               | 1.0                       | 1.1                       | 2.8                          | 2.3                          |
| 1mjc           | 57.0               | 67.5               | 0.8                       | 1.0                       | 3.0                          | 3.0                          |
| 1c9o           | 76.9               | 63.7               | -                         | 1.2                       | -                            | 4.6                          |
| 1bu7           | 47.0               | 82.1               | -                         | 0.9                       | -                            | 2.5                          |
| 1oxa           | 55.1               | 63.1               | -                         | 1.5                       | -                            | 2.2                          |
| 1akd           | 56.0               | 70.1               | 1.4                       | 0.8                       | 3.0                          | 1.8                          |
| 1n97           | 88.5               | 56.5               | 1.1                       | 2.5                       | 5.7                          | 2.2                          |
| 1f4t           | 91.2               | 64.7               | -                         | 1.3                       | -                            | 2.0                          |
| 1rgg           | 49.3               | 45.1               | 1.5                       | 1.5                       | 5.5                          | 2.4                          |
| 9rnt           | 50.9               | 60.2               | 1.6                       | 1.0                       | 6.1                          | 3.1                          |
| 1rnh           | 53.2               | 44.5               | -                         | 1.5                       | -                            | 2.2                          |
| 1rbn           | 63.6               | 39.2               | 1.3                       | 1.9                       | 10.3                         | 2.2                          |
| 2ehg           | 102.0              | 127.3              | -                         | 0.7                       | -                            | 4.8                          |

**Table S 2.** Predicted and experimental values of the thermodynamic and thermal parameters for the set of 45 proteins.
