# Supplementary material for: Stability Curve Prediction of Homologous Proteins Using Temperature-Dependent Statistical Potentials
Source: PubMed Central journal article supplement (PMC4102405; doi:10.1371/journal.pcbi.1003689), 2014-07-17
Supplement: pcbi.1003689.s003.pdf [file pcbi.1003689.s003.pdf]

| <b>Protein</b> | $\Delta G(T)$                                   |
|----------------|-------------------------------------------------|
| PDB code       | kcal/mol                                        |
| 1aqh           | 3860.99 - 86.8982 T + 12.9713 T Log[T]          |
| 1ppi           | 3866.36 - 89.5051 T + 13.1163 T Log[1.14269 T]  |
| 1jae           | 3212.63 - 71.7649 T + 10.4746 T Log[1.12665 T]  |
| 1smd           | 3239.23 - 72.4588 T + 10.5722 T Log[1.13045 T]  |
| 1am7           | 740.954 - 17.6867 T + 2.58129 T Log[1.20195 T]  |
| 2lzm           | 447.878 - 10.2061 T + 1.47989 T Log[1.18706 T]  |
| 1lz1           | 497.429 - 11.7137 T + 1.7046 T Log[1.20381 T]   |
| 4lyz           | 992.4 - 23.4861 T + 3.41658 T Log[1.21555 T]    |
| 2fal           | 751.643 - 17.189 T + 2.50954 T Log[1.15221 T]   |
| 1ymb           | 410.117 - 9.42587 T + 1.37269 T Log[1.17118 T]  |
| 1bvc           | 524.843 - 11.7968 T + 1.71343 T Log[1.16176 T]  |
| 1blc           | 716.342 - 18.0326 T + 2.62193 T Log[1.28633 T]  |
| 1ke4           | 684.089 - 17.4128 T + 2.5406 T Log[1.27381 T]   |
| 4blm           | 725.826 - 17.9924 T + 2.61018 T Log[1.28217 T]  |
| 1bmc           | 750.606 - 19.2861 T + 2.81409 T Log[1.29056 T]  |
| 1hml           | 622.629 - 14.8865 T + 2.19367 T Log[1.13704 T]  |
| 1hfh           | 272.453 - 6.45412 T + 0.947868 T Log[1.14734 T] |
| 1hmk           | 232.416 - 5.77366 T + 0.850859 T Log[1.17494 T] |
| 2vh7           | 351.312 - 8.25193 T + 1.20404 T Log[1.1788 T]   |
| 2bjd           | 585.737 - 13.7018 T + 1.98576 T Log[1.21784 T]  |
| 1v3z           | 443.563 - 9.95537 T + 1.43565 T Log[1.19505 T]  |
| 1p3j           | 524.985 - 13.3849 T + 1.93869 T Log[1.32416 T]  |
| 3fb4           | 639.886 - 16.5572 T + 2.40313 T Log[1.33407 T]  |
| 1s3g           | 667. - 17.3464 T + 2.52038 T Log[1.335 T]       |
| 1aky           | 645.189 - 16.9039 T + 2.45787 T Log[1.33847 T]  |
| 1ank           | 667. - 17.6254 T + 2.56485 T Log[1.34432 T]     |
| 1zip           | 596. - 14.9906 T + 2.16218 T Log[1.33502 T]     |
| 1oa3           | 719.211 - 17.195 T + 2.50838 T Log[1.20521 T]   |
| 1h8v           | 820.577 - 19.5571 T + 2.85048 T Log[1.20689 T]  |
| 1oa4           | 1128.04 - 26.642 T + 3.88385 T Log[1.19568 T]   |
| 1olr           | 839.648 - 19.8894 T + 2.89999 T Log[1.19833 T]  |
| 1cec           | 862.042 - 20.6886 T + 3.01991 T Log[1.20239 T]  |
| 1csp           | 309.138 - 7.3005 T + 1.06576 T Log[1.18791 T]   |
| 1mjc           | 288.612 - 6.72252 T + 0.98012 T Log[1.17757 T]  |
| 1c9o           | 334.18 - 8.10868 T + 1.18453 T Log[1.20768 T]   |
| 1bu7           | 281.869 - 6.23575 T + 0.909218 T Log[1.11956 T] |
| 1oxa           | 461.178 - 10.4542 T + 1.52719 T Log[1.13786 T]  |
| 1akd           | 252.281 - 5.74163 T + 0.839486 T Log[1.13374 T] |
| 1n97           | 728.244 - 16.9065 T + 2.47019 T Log[1.16443 T]  |
| 1f4t           | 393.736 - 8.9814 T + 1.30875 T Log[1.1613 T]    |
| 1rgg           | 519.34 - 12.382 T + 1.81022 T Log[1.19216 T]    |
| 9rnt           | 343.652 - 8.11141 T + 1.1846 T Log[1.1829 T]    |
| 1rnh           | 504.735 - 12.0398 T + 1.75963 T Log[1.19517 T]  |
| 1rbn           | 666.692 - 16.0392 T + 2.34435 T Log[1.20578 T]  |
| 2ehg           | 279.16 - 6.01699 T + 0.865223 T Log[1.16887 T]  |

**Table S 3.** Analytic expression of the predicted stability curves (in kcal/mol) for the set of 45 proteins.
